# Supplementary material
Source: Atypon-hosted journal article supplement (https://www.archive.jpma.org.pk/PdfDownloadsupplements/747)
Supplement: 747 [file 747]

## Author Index

### A

**Abbas S A** see Mughal A

**Abbasi A** see Mughal A

**Abidi S S et al**

Diagnostic accuracy of axillary nodal ultrasound after neoadjuvant chemotherapy in node-positive breast cancer patients: A validation study, Page, S-25

**Abidi S S** see Vohra L M

**Adnan N et al**

Understanding deep learning — challenges and prospects, Page-S-59

**Adnan S et al**

Factors affecting specialty choice of postgraduate dental residents in Karachi, Pakistan, Page, S-20

**Ahmed S** see Waqar U

**Ahmed S** see Waqar U

**Ahmed S** see Waqar U

**Akhtar S** see Mughal A

**Ali D** see Vohra L M

**Awan M S** see Unar A A

**Ayaz A** see Hasan O

**Azam S I** see Raza F

**Aziz N** see Martins R S

**Aziz N** see Waqar U

### B

**Badar S B et al**

Radiographic evaluation of the margins of clinically acceptable metal-ceramic crowns, Page - S-35

**Badini S** see Pirzada M A

**Baig A M** see Hasan O

**Baloch N** see Hasan O

**Batool S** see Ramesh P

### C

**Chauhan S S B** see Noorali A A

### D

**Deewani M H** see Unar A A

### E

**Ehsan A N** see Noorali A A

**Enam S A** see Siddiqui N A

**Enam S A** see Waqar U

### F

**Fatimi S H** see Martins R S

**Fatimi S H** see Martins R S

**Fatimi S H** see Noorali A A

### G

**Ghafoor R** see Badar S B

**Ghandhi D** see Siddiqui A

**Gillani M** see Martins R S

### H

**Hameed A N** see Waqar U

**Hameed A N** see Waqar U

**Hasan A** see Raza F

**Hasan O et al**

Innovations in surgery between the past and future: A narrative review of targeted literature, Page-S-55

**Hashmi S A** see Unar A A

**Hashmi S** see Kamal M M

**I****Inam H** see Martins R S**Inam H** see Waqar U**Inam H** see Waqar U**Inam H** see Waqar U**J****Jabeen D** see Vohra L M**Joseph E A** see Martins R S**K****Kamal M M et al**

Temporary epicardial pacing wires in isolated Coronary artery bypass graft: Necessity or force of habit?, Page-S16

**Kazi M** see Martins R S**Kazmi S M R** see Khan F R**Kerawala A A** see Abidi S S**Khan F R et al**

Bonded amalgam as a fissure sealant in low-income setting: A randomised controlled trial, Page-S-3

**Khan F R et al**

A bibliometric analysis of the studies on dental implant failure, Page-S-76

**Khan F R** see Badar S B**Khan H** see Ramesh P**Khan M A** see Noorali A A**Khan R N** see Siddiqui N A**Khan S** see Waqar U**L****Liaquat S** see Raza F**Lone M M** see Adnan S**M****Mahar P S** see Momin S N A**Mehdi M** see Kamal M M**Malik M B** see Momin S N A**Mansoor M** see Waqar U**Martins R S****Martins R S et al**

Narrative Review: The environment under the knife: A review of current Eco-surgical strategies and recommendations for Pakistan, Page-S-112

**Martins R S et al**

Pilot Study: Radial artery coronary bypass grafting: Surgical outcomes of an unexplored innovation in a developing country, Page-S-106

**Martins R S** see Saqib S U**Masood L** see Hasan O**Masood L** see Martins R S**Masroor I** see Abidi S S**Memon A S** see Momin S N A**Merchant A A H** see Kamal M M**Merchant A A H** see Noorali A A**Momin S N A et al**

Short Report: Surgical training in ophthalmology: Role of EyeSi in the era of simulation-based learning, Page-S-127

**Mughal A et al**

Rates of publication of FCPS dissertations in international and national peer-review journals among residents at AKUH; A cross sectional review of 15 years, Page – S-40

**Mughal A** see Unar A A**Munir M M** see Kamal M M**Murtaza G** see Ramesh P**N****Naved N et al**

Navigating through our history in research: An altmetric analysis for publications by the full-time operative dentistry faculty at the Aga Khan University Hospital in the past decade, Page, S-30

**Nazim S M et al**

Surgeons and ethical challenges in operating room, Page-S-64

**Noorali A A et al**

Conceptual framework for a cardiac surgery simulation laboratory and competency-based curriculum in Pakistan — a short innovation report, Page-S-103

**Nusrat M** see Ramesh P

**O**

**Osman M** see Kamal M M

**P**

**Pervez M B** see Noorali A A

**Pirzada M A et al**

Role of simulation in open varicose veins surgery: A systematic review, Page-S-49  
Publication Committee

**Q**

**Qadir M A** see Waqar U

**R**

**Raees M A** see Siddiqui N A

**Rafique G** see Raza F

**Ramesh P et al**

Manual loop in laparoscopic appendectomy: A retrospective cohort study and literature review, Page-S-10

**Rauf H** see Waqar U

**Rauf H** see Waqar U

**Riaz A** see Saqib S U

**Riaz Q** see Saqib S U

**S**

**Sadiq A** see Martins R S

**Saeed A** see Ramesh P

**Saqib S U et al**

In a digitally connected world through Likes, Hashtags and Followers — Advancing surgical research through a social media: A narrative review, Page-S-71

**Sattar A K** see Vohra L M

**Shahabuddin S** see Nazim S M

**Shaikh F A** see Pirzada M A

**Shamim M S** see Siddiqui N A

**Sharif H** see Kamal M M

Short Report: PakSurg: The first trainee-lead model for multicenter surgical research collaboration in Pakistan, Page-S-130

**Siddiqui T A et al**

Artificial intelligence in dentistry, orthodontics and Orthognathic surgery: A literature review, Page-S-91

**Siddiqui N A et al**

Barriers in surgical research: A perspective from the developing world, Page-S-97

**Siddiqui N A et al**

Surgical research: Exploring our history — navigating the future, Page-S-2

**Siddiqui N A** see Pirzada M A

**Siddiqui Y F** see Khan F R

**Sohail A A** see Kamal M M

**Sukhia R H** see Siddiqui A

**T**

**Tahseen M U** see Abidi S S

**Tariq J** see Martins R S

**Tariq M** see Noorali A A

## U

**Ukrani R D** see Waqar U

**Umer F** see Adnan N

**Umer F** see Naved N

**Unar A A et al**

Otorhinolaryngology consultations in a multidisciplinary hospital — their effects on residents training on floor, Page-S-44

## V

**Vardag A B S** see Unar A A

**Vargad A B S** see Mughal A

**Vohra L M et al**

Current perspectives of oncoplastic breast surgery in Pakistan, Page-S-81

**Vohra L M** see Abidi S S

## W

**Waqar U et al**

**Waqar U et al**

Disparities in access to quality surgical care for women in resource-constrained settings: Bottlenecks and the way forward, Page-S-86

**Waqar U et al**

Short Report: Path to publication: A peer mentorship model for student-lead surgical research, Page-S124

**Waqar U et al**

Special Communication: Perioperative registries in resource-limited settings: The way forward for Pakistan, Page-S-118

**Wasif M** see Mughal A

## Z

**Zafar F** see Siddiqui N A

**Zafar H** see Saqib S U

**Zafar K** see Badar S B
